# Supplementary material
Source: publisher figshare collection journal article supplement (https://acs.figshare.com/ndownloader/files/3755362)
Supplement: Supplementary file 1 [file 3755362]

# **Niche Mimicking for Selection and Enrichment of Liver Cancer Stem Cells by Hyaluronic Acid-Based Multilayer Films**

**I-Chi Lee <sup>1,\*</sup>, Chun-Chieh Chuang <sup>1</sup>, Yu-Chieh Wu <sup>1</sup>**

<sup>1</sup>Graduate Institute of Biochemical and Biomedical Engineering, Chang Gung University, Taoyuan, Taiwan

\* Corresponding author: I-Chi Lee

Mailing address: 259 Wen-Hwa 1st Road, Kwei-Shan, Tao-Yuan, 333 Taiwan

E-mail: iclee@mail.cgu.edu.tw

Tel.: +886-3-2118800 ext 5985

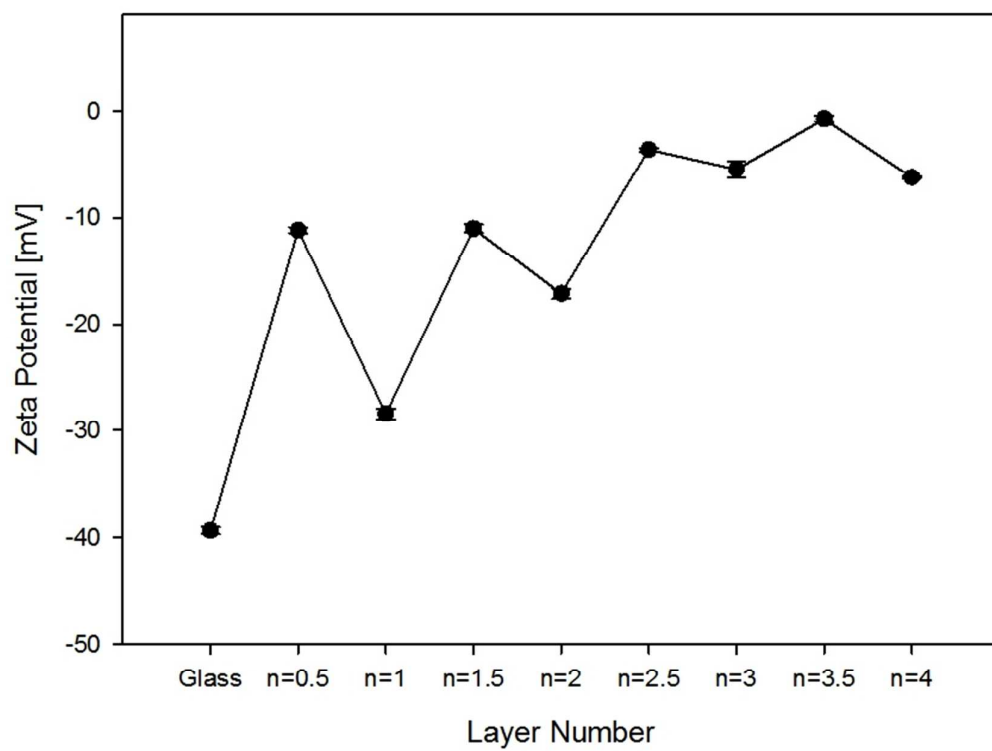

Figure S1. Zeta potential measurement of PAH/HA multilayer films immersed in  $10^{-3}$  M KCl solution.

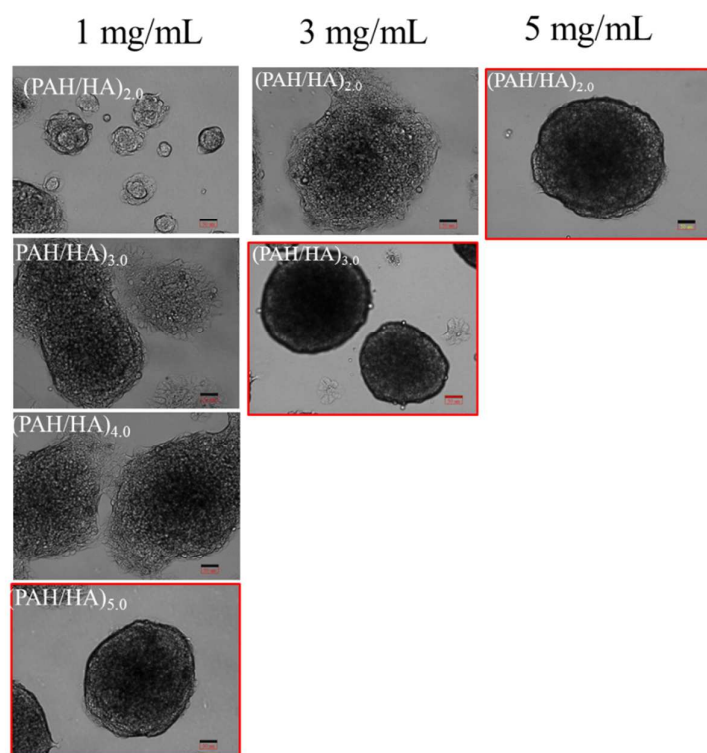

Figure S2. Morphological investigation of Huh7 cells seeded on different concentration of PAH/HA multilayer films by optical phase contrast microscopy after 3 days of culture.
